# Supplementary material
Source: Springer Nature journal article supplement (https://www.springermedizin.de/resource/supplementary/12936_2008_698_MOESM12_ESM.pdf/9548026)
Supplement: MOESM12 [file 9548026]

07\_000490877

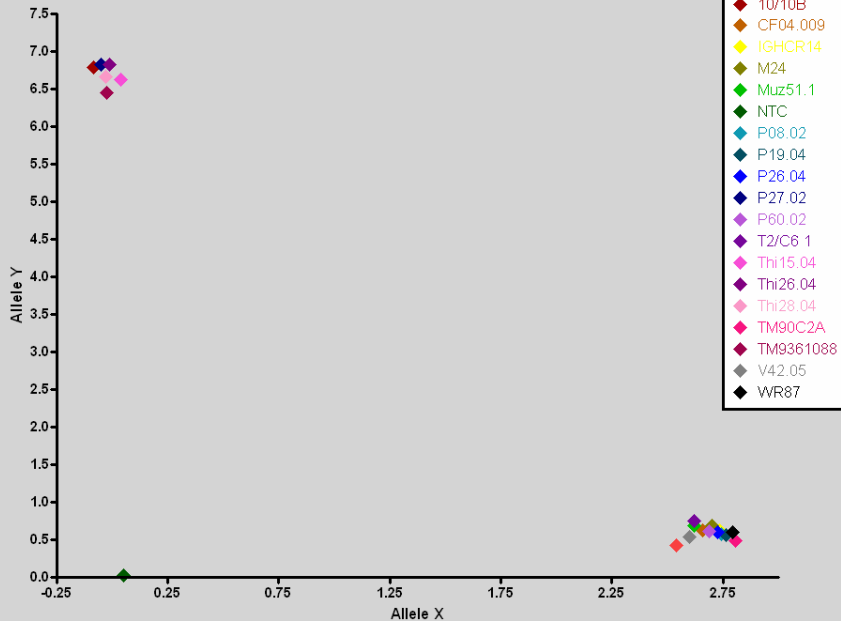

10\_001403751

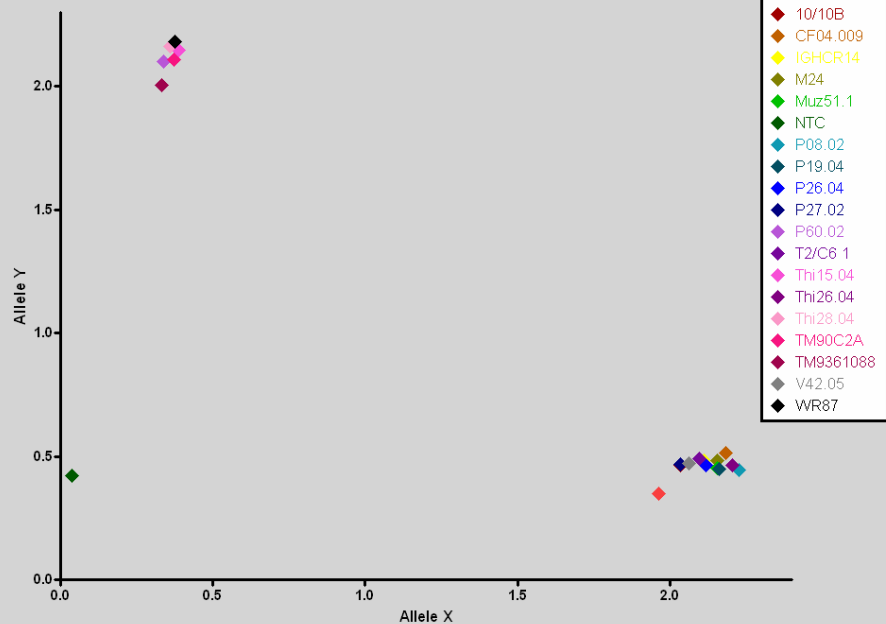

A.

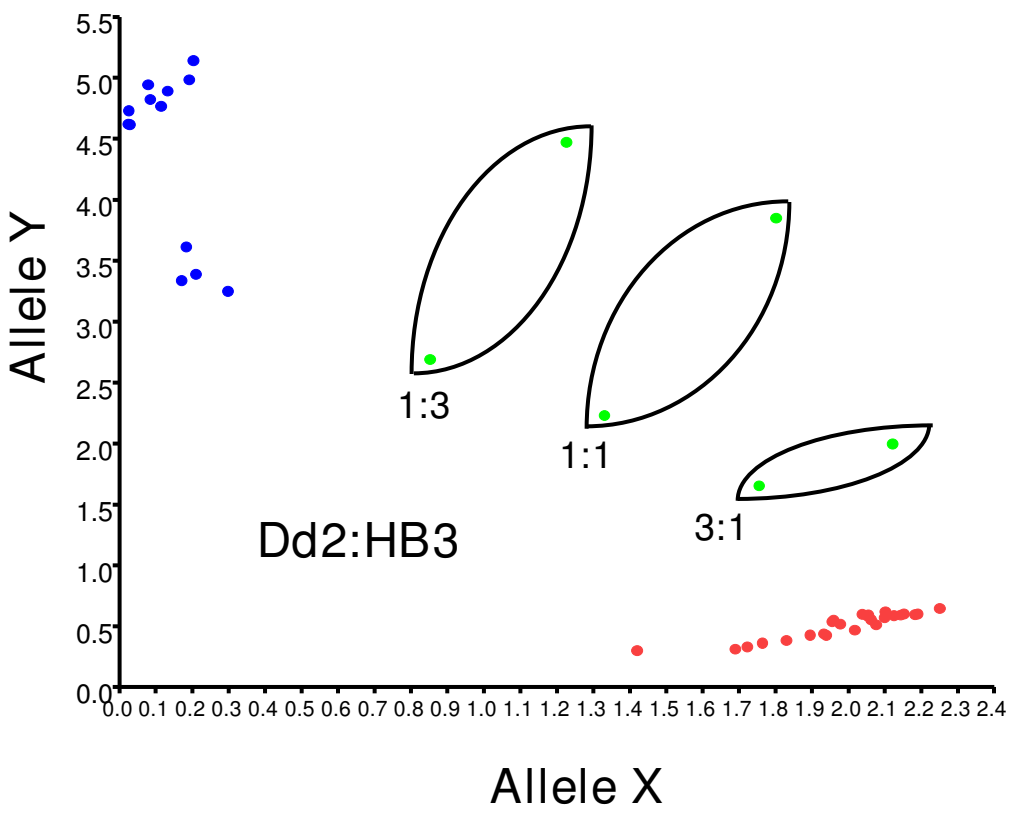

B.

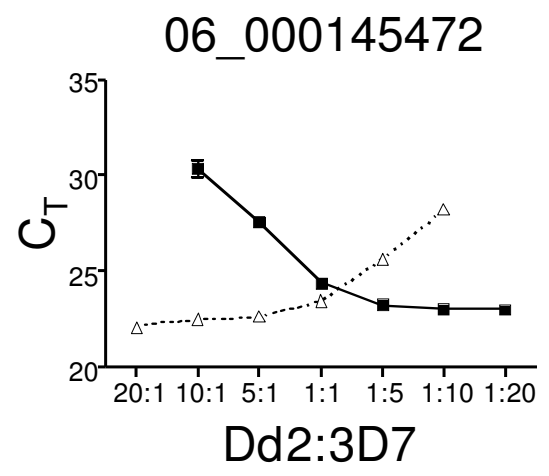

C.

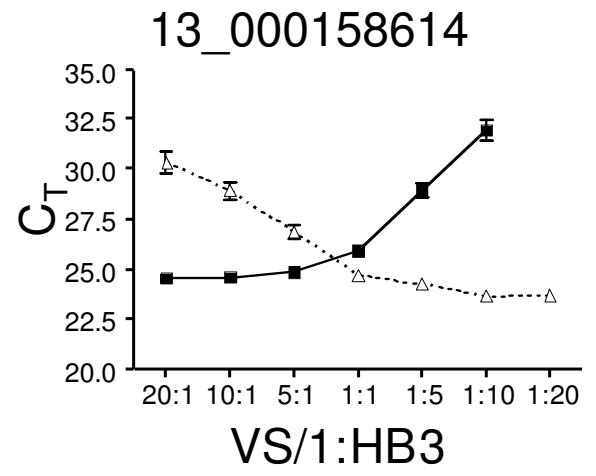

Daniels\_Figure 3

Molecular Barcode

Daniels\_Figure 4

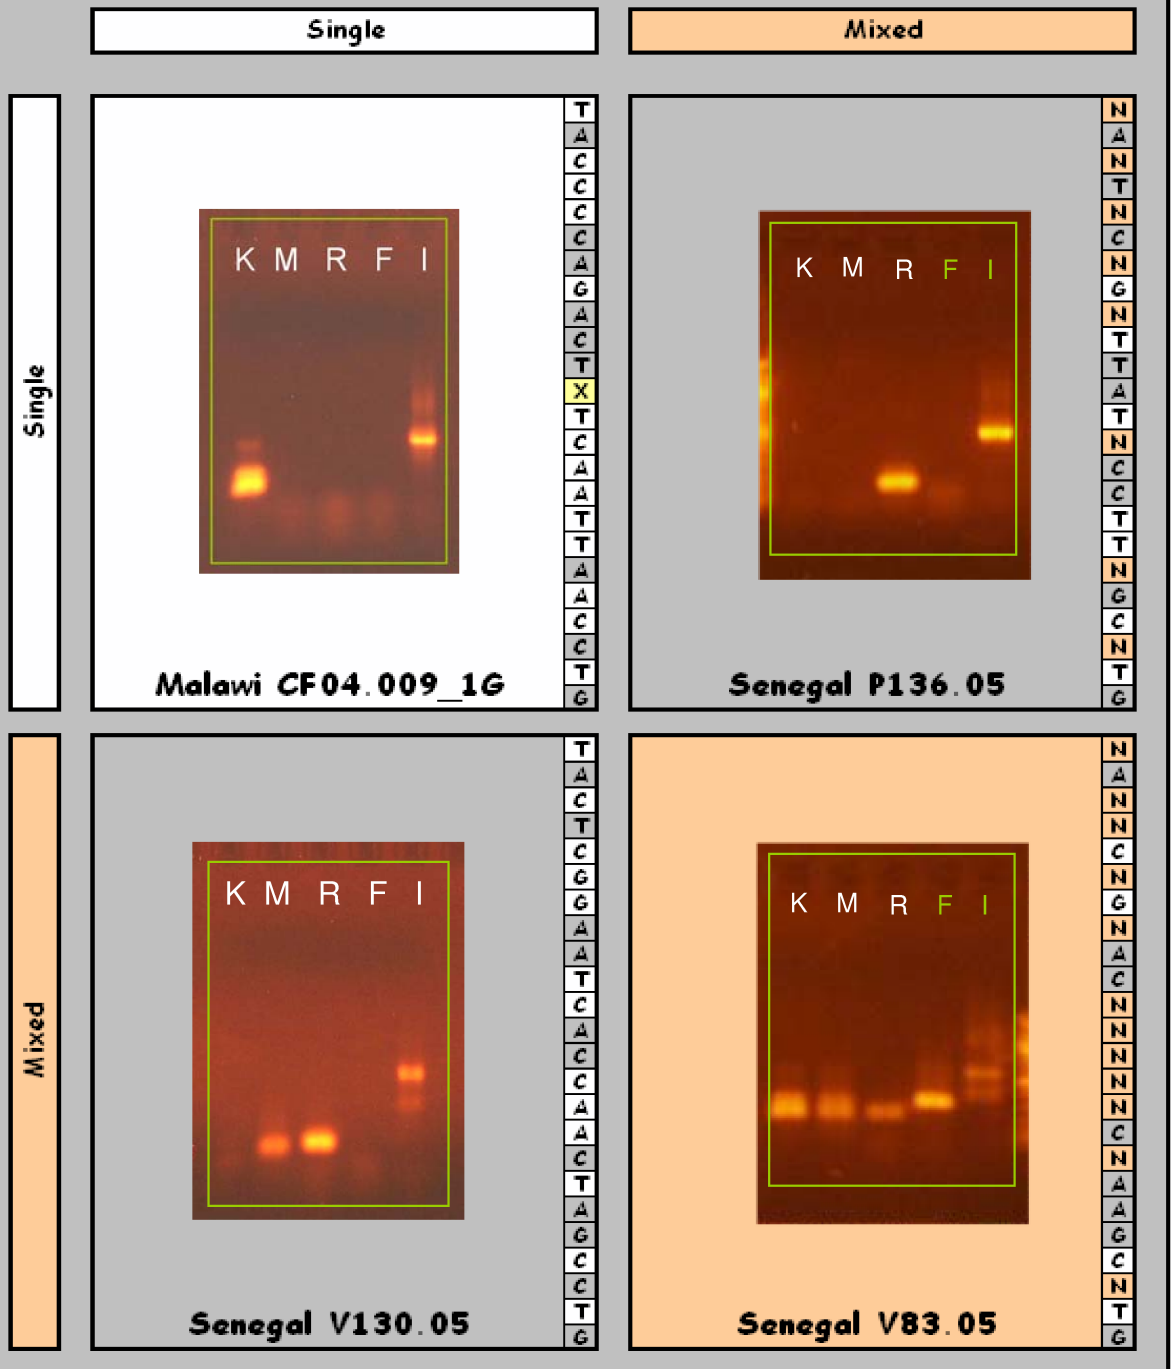

|   | Gene | Type   |
|---|------|--------|
| K | MSP1 | K1     |
| M | MSP1 | MAD20  |
| R | MSP1 | RO33   |
| F | MSP2 | FC27   |
| I | MSP2 | 3D7/IC |
